# Supplementary material for: Insight into the local near-infrared photothermal dynamics of graphene oxide functionalized polymers through optical microfibers
Source: Royal Society of Chemistry journal article supplement (doi:10.1039/c7cp07915j), 2018-01-01
Supplement: c7cp07915j1.pdf [file c7cp07915j1.pdf]

## Insight into the local near-infrared photothermal dynamics of graphene oxide functionalized polymer through optical microfiber

Yunyun Huang, Chaoyan Chen, Hongtao Li, Aoxiang Xiao, Tuan Guo, Bai-Ou Guan\*

Guangdong Provincial Key Laboratory of Optical Fiber Sensing and Communications, Institute of Photonics

Technology, Jinan University, Guangzhou 510632, China

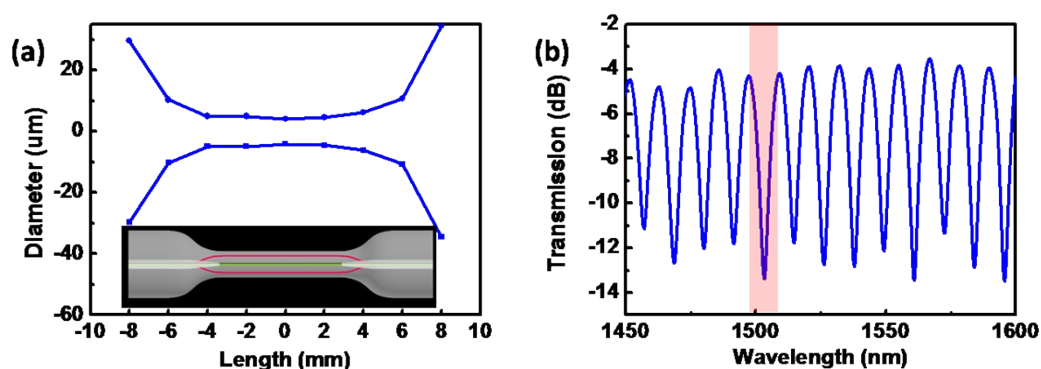

**Fig. S1.** (a) Geometry and (b) transmission spectrum of the silica microfiber interferometer in air. (The inset of a: Schematic illustration of the sensing region of microfiber; The marked region of b: The selected transmission notch used in spectra tracking in photothermal process.)

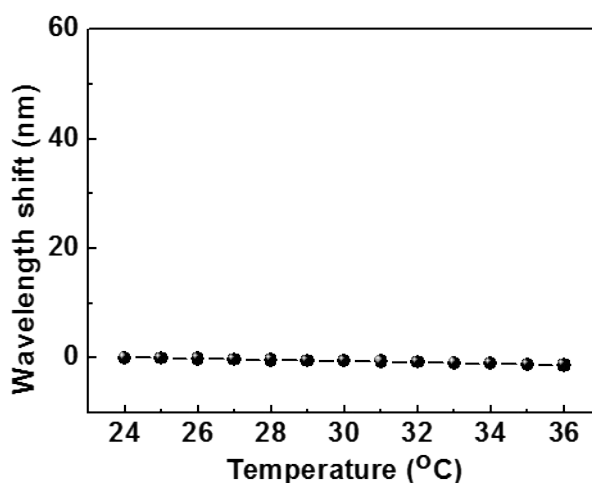

**Fig. S2.** Thermal response of the silica microfiber interferometer.

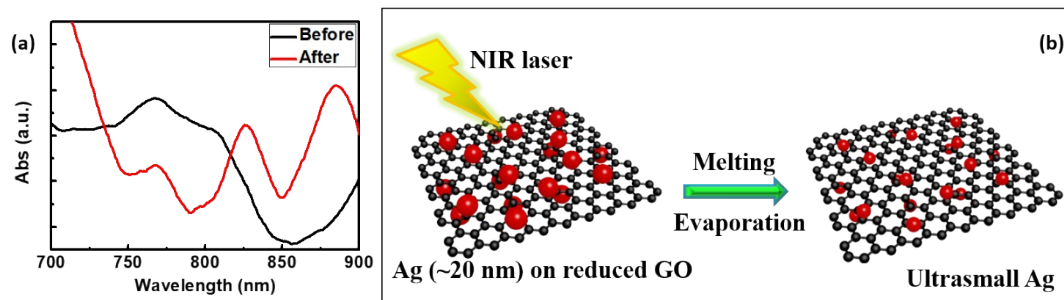

**Fig. S3.** (a) UV-vis absorption spectra and (b) schematic illustration of the Ag@G nanosheets before and after NIR laser irradiation.

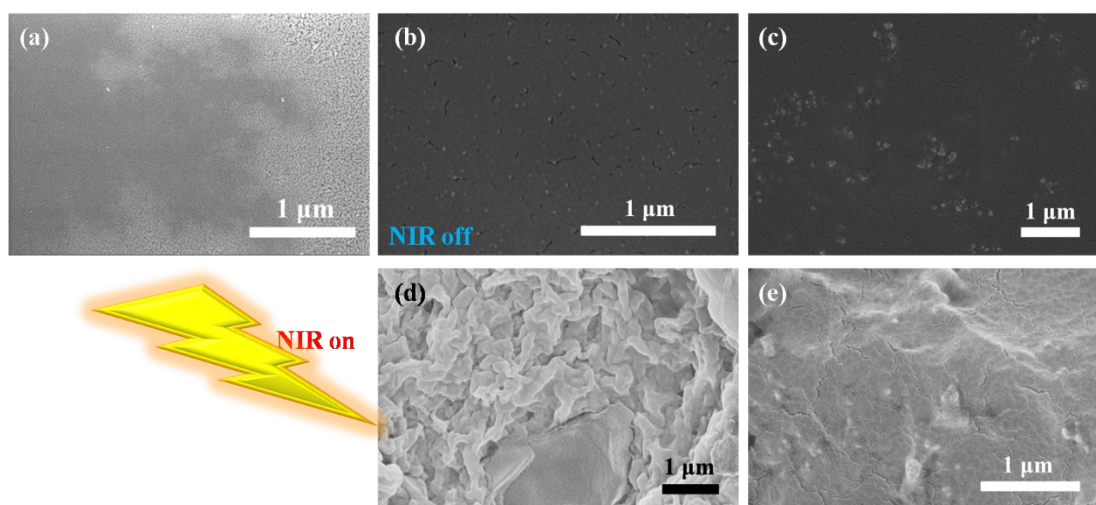

**Fig. S4.** SEM images of nanocomposites before and after phase transition. (a: PNIPAM; b, d: GO-PNIPAM; c, e: Ag@GO-PNIPAM; a-c: before phase transition, d-e: after phase transition.)
